# Supplementary material
Source: PubMed Central journal article supplement (PMC10880545)
Supplement: ehp12758.s001.acco.pdf [file ehp12758.s001.acco.pdf]

**Note to readers with disabilities:** *EHP* strives to ensure that all journal content is accessible to all readers. However, some figures and Supplemental Material published in *EHP* articles may not conform to [508 standards](#) due to the complexity of the information being presented. If you need assistance accessing journal content, please contact [ehp508@niehs.nih.gov](mailto:ehp508@niehs.nih.gov). Our staff will work with you to assess and meet your accessibility needs within 3 working days.

### **Supplemental Material**

#### **Evaluating the Effects of Chronic Oral Exposure to the Food Additive Silicon Dioxide on Oral Tolerance Induction and Food Sensitivities in Mice**

Bruno Lamas, Natalia Martins Breyner, Yann Malaisé, Mark Wulczynski, Heather J. Galipeau, Eric Gaultier, Christel Cartier, Elena F. Verdu, and Eric Houdeau

#### **Table of Contents**

**Figure S1.** Transmission electron microscopy (TEM) analyses of the *fg*-SiO<sub>2</sub> particles. Representative transmission electron microscopy image of the *fg*-SiO<sub>2</sub> suspension in ultra-pure water (10 mg/mL).

**Figure S2.** Intestinal permeability in mice after oral exposure to food-grade SiO<sub>2</sub>. *In vitro* paracellular FITC-dextran flux measured for 1h in Ussing chambers in ileum (A) or colon (B) segments from mice orally exposed to *fg*-SiO<sub>2</sub> (n=8 mice per group) or to the vehicle (n=10) for 60 days. The data are expressed as median with interquartile range and whiskers extending from minimum to maximum ± SEM. \*p<0.05 by one-way ANOVA and *post-hoc* Tukey test (A) or Kruskal-Wallis test followed by a *post-hoc* Dunn's test (B). See Table S4 for data.

**Figure S3.** MLN cell viability and frequency after *ex vivo* treatment with food-grade SiO<sub>2</sub>. (A) Cell suspension from MLN of untreated mice (n=4 mice per group) were exposed for 48h to various concentrations of *fg*-SiO<sub>2</sub> (0, 6.25, 12.5, 25 and 50 µg/mL). Frequency of viable cells was evaluated by flow cytometry analysis of propidium iodide staining and normalized to control. (B-F) Cell suspension from MLN of untreated mice (n=9 per group) were exposed for 48h to various concentrations of *fg*-SiO<sub>2</sub> (0, 6.25, 12.5, 25 and 50 µg/mL) before stimulation for 5h with phorbol 12-myristate 13-acetate (PMA) and ionomycin. Frequency of CD3<sup>+</sup> CD4<sup>+</sup> cells (B), of CD3<sup>+</sup> CD4<sup>+</sup> CD25<sup>+</sup> cells (C), of CD3<sup>+</sup> CD4<sup>+</sup> CD25<sup>+</sup> Foxp3<sup>+</sup> cells (D), of CD45<sup>+</sup> CD103<sup>+</sup> CD11b<sup>+</sup> cells (E), and of CD3<sup>+</sup> CD4<sup>+</sup> Tbet<sup>+</sup> cells (F) was evaluated by flow cytometry. (G) Cell suspension from MLN of untreated mice (n=7 per group) were exposed for 3 days to concanavalin-A (a T-cell mitogen) in presence of various concentrations of *fg*-SiO<sub>2</sub> (0, 6.25, 12.5, 25 and 50 µg/mL). Frequency of dead T cells was evaluated by flow cytometry analysis of Viability 488/520 Fixable Dye staining. The data are expressed as median with interquartile range and whiskers extending from minimum to maximum ± SEM. \*p<0.05 by Kruskal-Wallis test followed by a *post-hoc* Dunn's test (A) or one-way ANOVA and *post-hoc* Tukey test (B-G). See Table S4 for data.

**Figure S4.** The gating strategy for analysis of T cell subpopulations from MLN *ex vivo* exposed to food-grade SiO<sub>2</sub>. Flow cytometry gating strategy for quantification of T cell subpopulations from MLN of untreated mice (n=9 per group) *ex vivo* exposed for 48h to various concentrations of *fg*-SiO<sub>2</sub> (0, 6.25, 12.5, 25 and 50 µg/mL) before stimulation for 5h with phorbol 12-myristate 13-acetate (PMA) and ionomycin. The frequency of CD3<sup>+</sup> CD4<sup>+</sup> cells, CD3<sup>+</sup> CD4<sup>+</sup> CD25<sup>+</sup> cells, CD3<sup>+</sup> CD4<sup>+</sup> CD25<sup>+</sup> Foxp3<sup>+</sup> cells, CD3<sup>+</sup> CD4<sup>+</sup> CD25<sup>+</sup> Foxp3<sup>+</sup> IL-10<sup>+</sup> cells, CD3<sup>+</sup> CD4<sup>+</sup> Tbet<sup>+</sup> cells, and CD3<sup>+</sup> CD4<sup>+</sup> Tbet<sup>+</sup> IFN-γ<sup>+</sup> cells was evaluated by flow cytometry. SS: side scatter. FS: forward scatter. FS-H: forward scatter height.

**Figure S5.** The gating strategy for analysis of CD45<sup>+</sup> CD11b<sup>+</sup> CD103<sup>+</sup> cells from MLN *ex vivo* exposed to food-grade SiO<sub>2</sub>. Flow cytometry gating strategy for quantification of CD45<sup>+</sup> CD11b<sup>+</sup> CD103<sup>+</sup> cells (including DC and macrophage subpopulations) from MLN of untreated mice (n=9 per group) *ex vivo* exposed for 48h to various concentrations of *fg*-SiO<sub>2</sub> (0, 6.25, 12.5, 25 and 50 µg/mL) before stimulation for 5h with phorbol 12-myristate 13-acetate (PMA) and ionomycin. The frequency of CD45<sup>+</sup> CD11b<sup>+</sup> CD103<sup>+</sup> cells and CD45<sup>+</sup> CD11b<sup>+</sup> CD103<sup>+</sup> TGF-β<sup>+</sup> cells was evaluated by flow cytometry. SS: side scatter. FS: forward scatter. FS-H: forward scatter height.

**Figure S6.** The gating strategy for analysis of T cells proliferation. Flow cytometry gating strategy for quantification of CD4<sup>+</sup> proliferating cells isolated from MLN of untreated mice. Cell suspension from MLN of untreated mice were exposed for 3 days to concanavalin-A (a T-cell mitogen) in the absence or presence of various concentrations of *fg*-SiO<sub>2</sub> (0, 6.25, 12.5, 25 and 50 µg/mL). SS: side scatter. FS: forward scatter. FS-H: forward scatter height.

**Figure S7.** The gating strategy for analysis of T cells from colon *lamina propria*. Flow cytometry gating strategy for quantification of CD3<sup>+</sup> CD4<sup>+</sup> and CD3<sup>+</sup> CD4<sup>+</sup> CD25<sup>+</sup> subpopulations isolated from the colon *lamina propria* of OVA-immunized (PBS) or OVA-tolerized mice exposed to a vehicle or *fg*-SiO<sub>2</sub> through gavage (gav) or food. SS: side scatter. FS: forward scatter. FS-H: forward scatter height.

**Figure S8.** The gating strategy for analysis of CD45<sup>+</sup> CD11b<sup>+</sup> CD103<sup>+</sup> cells from colon *lamina propria*. Flow cytometry gating strategy for quantification of CD45<sup>+</sup> CD11b<sup>+</sup> and CD103<sup>+</sup> subpopulations isolated from the colon *lamina propria* of OVA-immunized (PBS) or OVA-tolerized mice exposed to a vehicle or *fg*-SiO<sub>2</sub> through gavage (gav) or food. SS: side scatter. FS: forward scatter. FS-H: forward scatter height.

**Table S1.** *fg*-SiO<sub>2</sub> sample characterization by DLS.

**Table S2.** Oral tolerance and challenge with OVA protocol.

**Table S3.** qPCR primers used for gene expression analysis.

**Table S4.** Corresponding numeric data for all figures. Reported is the measured data for all replicates.

## Supplemental figures

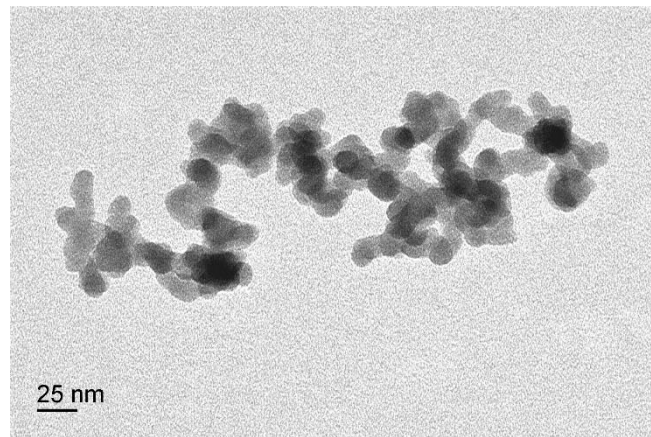

**Figure S1:** Transmission electron microscopy (TEM) analyses of the *fg*-SiO<sub>2</sub> particles. Representative transmission electron microscopy image of the *fg*-SiO<sub>2</sub> suspension in ultra-pure water (10 mg/mL).

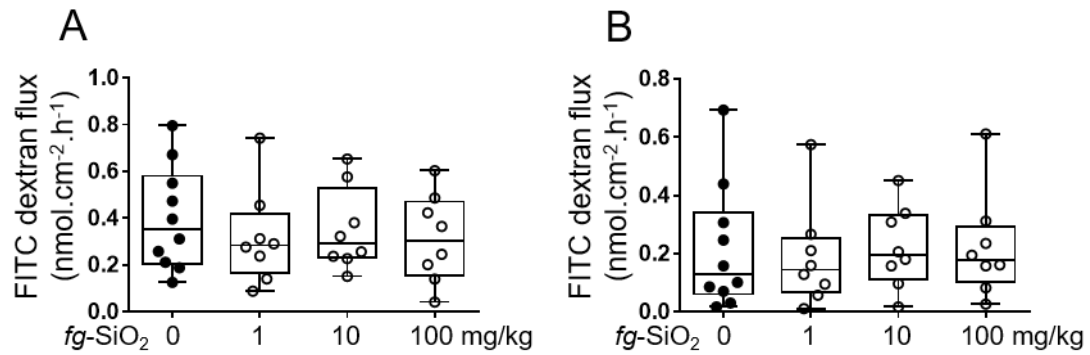

**Figure S2.** Intestinal permeability in mice after oral exposure to food-grade SiO<sub>2</sub>. *In vitro* paracellular FITC-dextran flux measured for 1h in Ussing chambers in ileum (A) or colon (B) segments from mice orally exposed to *fg*-SiO<sub>2</sub> (n=8 mice per group) or to the vehicle (n=10) for 60 days. The data are expressed as median with interquartile range and whiskers extending from minimum to maximum  $\pm$  SEM. \* $p < 0.05$  by one-way ANOVA and *post-hoc* Tukey test (A) or Kruskal-Wallis test followed by a *post-hoc* Dunn's test (B). See Table S4 for data.

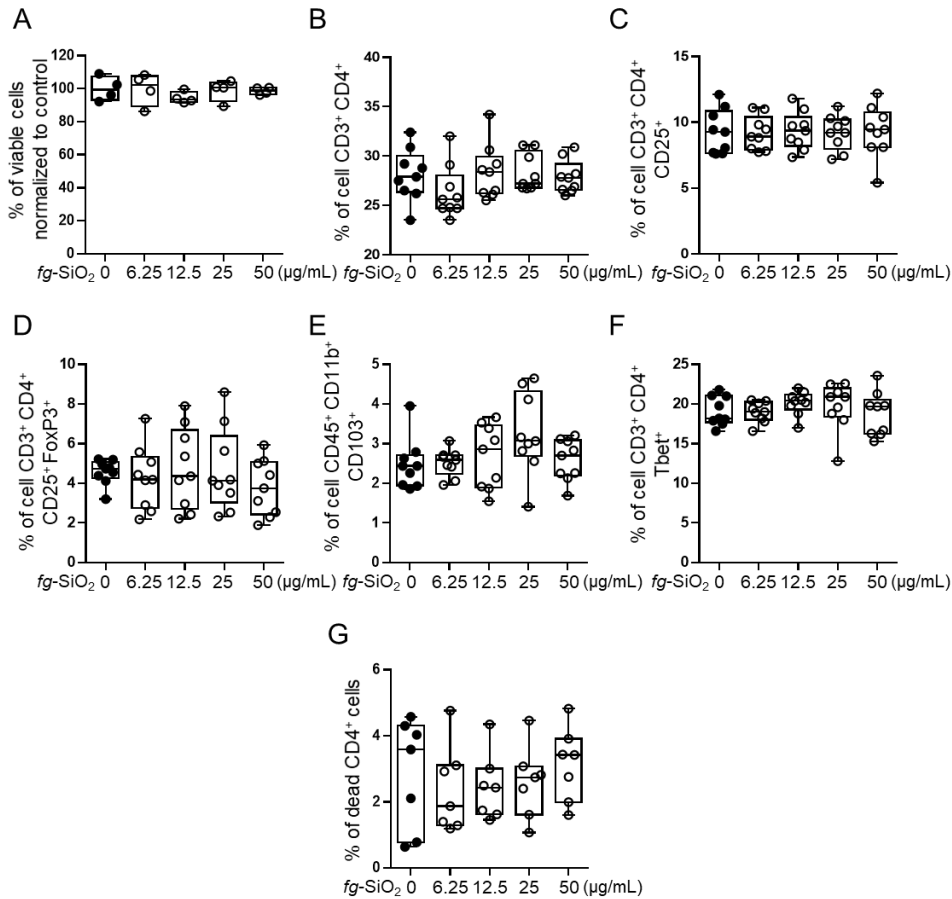

**Figure S3.** MLN cell viability and frequency after *ex vivo* treatment with food-grade SiO<sub>2</sub>. (A) Cell suspension from MLN of untreated mice (n=4 mice per group) were exposed for 48h to various concentrations of *fg*-SiO<sub>2</sub> (0. 6.25. 12.5. 25 and 50 µg/mL). Frequency of viable cells was evaluated by flow cytometry analysis of propidium iodide staining and normalized to control. (B-F) Cell suspension from MLN of untreated mice (n=9 per group) were exposed for 48h to various concentrations of *fg*-SiO<sub>2</sub> (0. 6.25. 12.5. 25 and 50 µg/mL) before stimulation for 5h with phorbol 12-myristate 13-acetate (PMA) and ionomycin. Frequency of CD3+ CD4+ cells (B), of CD3+ CD4+ CD25+ cells (C), of CD3+ CD4+ CD25+ FoxP3+ cells (D), of CD45+ CD103+ CD11b+ cells (E), and of CD3+ CD4+ Tbet+ cells (F) was evaluated by flow cytometry. (G) Cell suspension from MLN of untreated mice (n=7 per group) were exposed for 3 days to concanavalin-A (a T-cell mitogen) in presence of various concentrations of *fg*-SiO<sub>2</sub> (0. 6.25. 12.5. 25 and 50 µg/mL). Frequency of dead T cells was evaluated by flow cytometry analysis of Viability 488/520 Fixable Dye staining. The data are expressed as median with interquartile range and whiskers extending from minimum to maximum ± SEM. \*p<0.05 by Kruskal-Wallis test followed by a *post-hoc* Dunn's test (A) or one-way ANOVA and *post-hoc* Tukey test (B-G). See Table S4 for data.

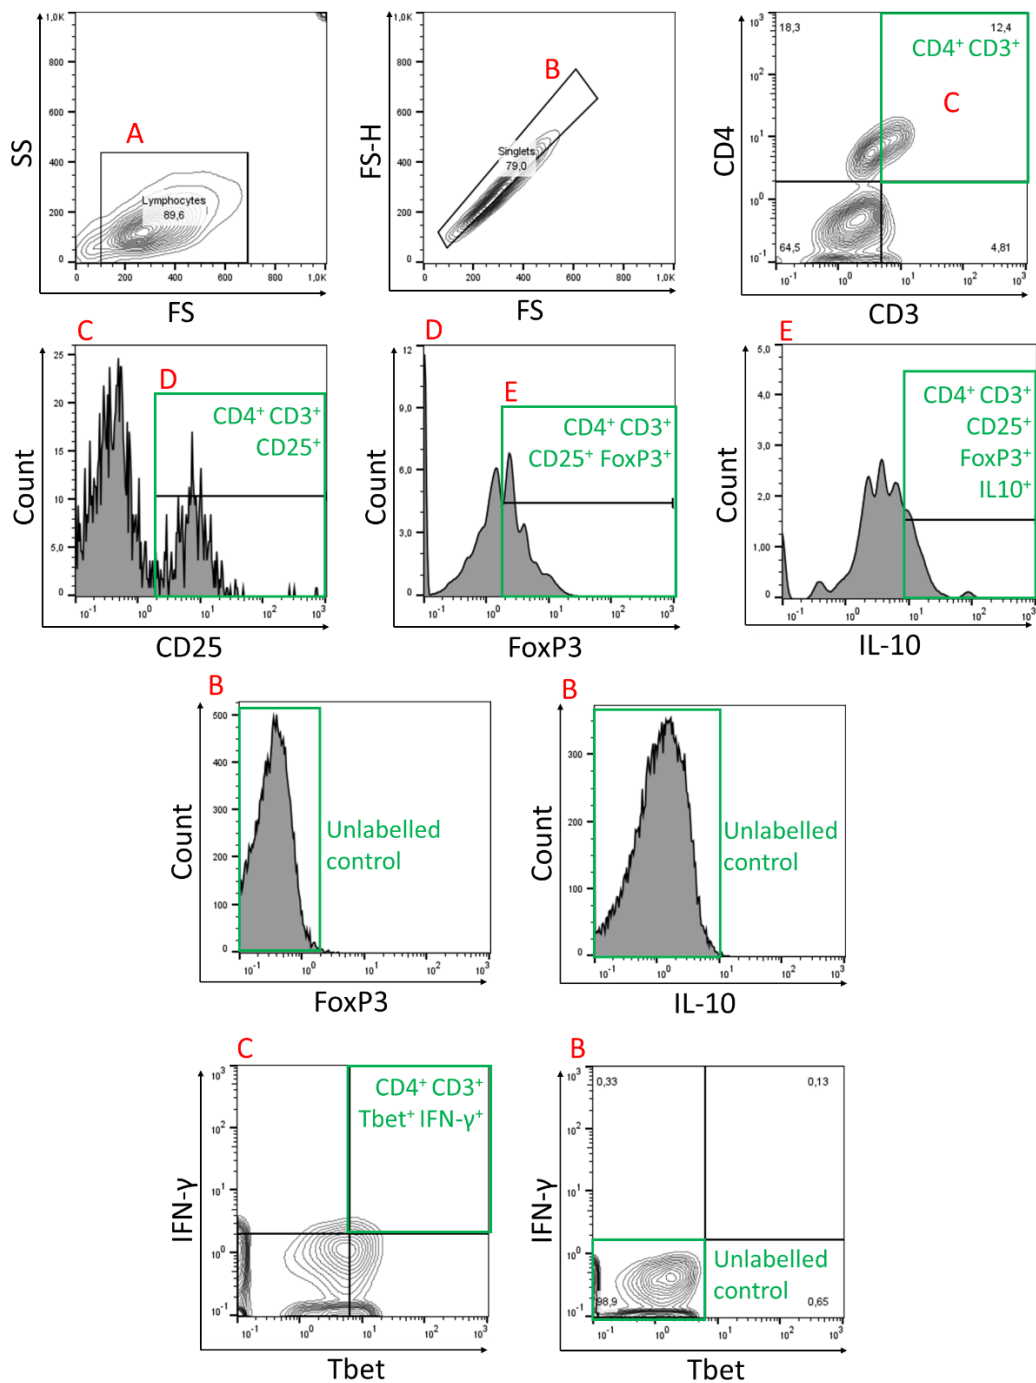

**Figure S4.** The gating strategy for analysis of T cell subpopulations from MLN *ex vivo* exposed to food-grade SiO<sub>2</sub>. Flow cytometry gating strategy for quantification of T cell subpopulations from MLN of untreated mice (n=9 per group) *ex vivo* exposed for 48h to various concentrations of *fg*-SiO<sub>2</sub> (0, 6.25, 12.5, 25 and 50 μg/mL) before stimulation for 5h with phorbol 12-myristate 13-acetate (PMA) and ionomycin. The frequency of CD3<sup>+</sup> CD4<sup>+</sup> cells, CD3<sup>+</sup> CD4<sup>+</sup> CD25<sup>+</sup> cells, CD3<sup>+</sup> CD4<sup>+</sup> CD25<sup>+</sup> Foxp3<sup>+</sup> cells, CD3<sup>+</sup> CD4<sup>+</sup> CD25<sup>+</sup> Foxp3<sup>+</sup> IL-10<sup>+</sup> cells, CD3<sup>+</sup> CD4<sup>+</sup> Tbet<sup>+</sup> cells, and CD3<sup>+</sup> CD4<sup>+</sup> Tbet<sup>+</sup> IFN-γ<sup>+</sup> cells was evaluated by flow cytometry. SS: side scatter. FS: forward scatter. FS-H: forward scatter height.

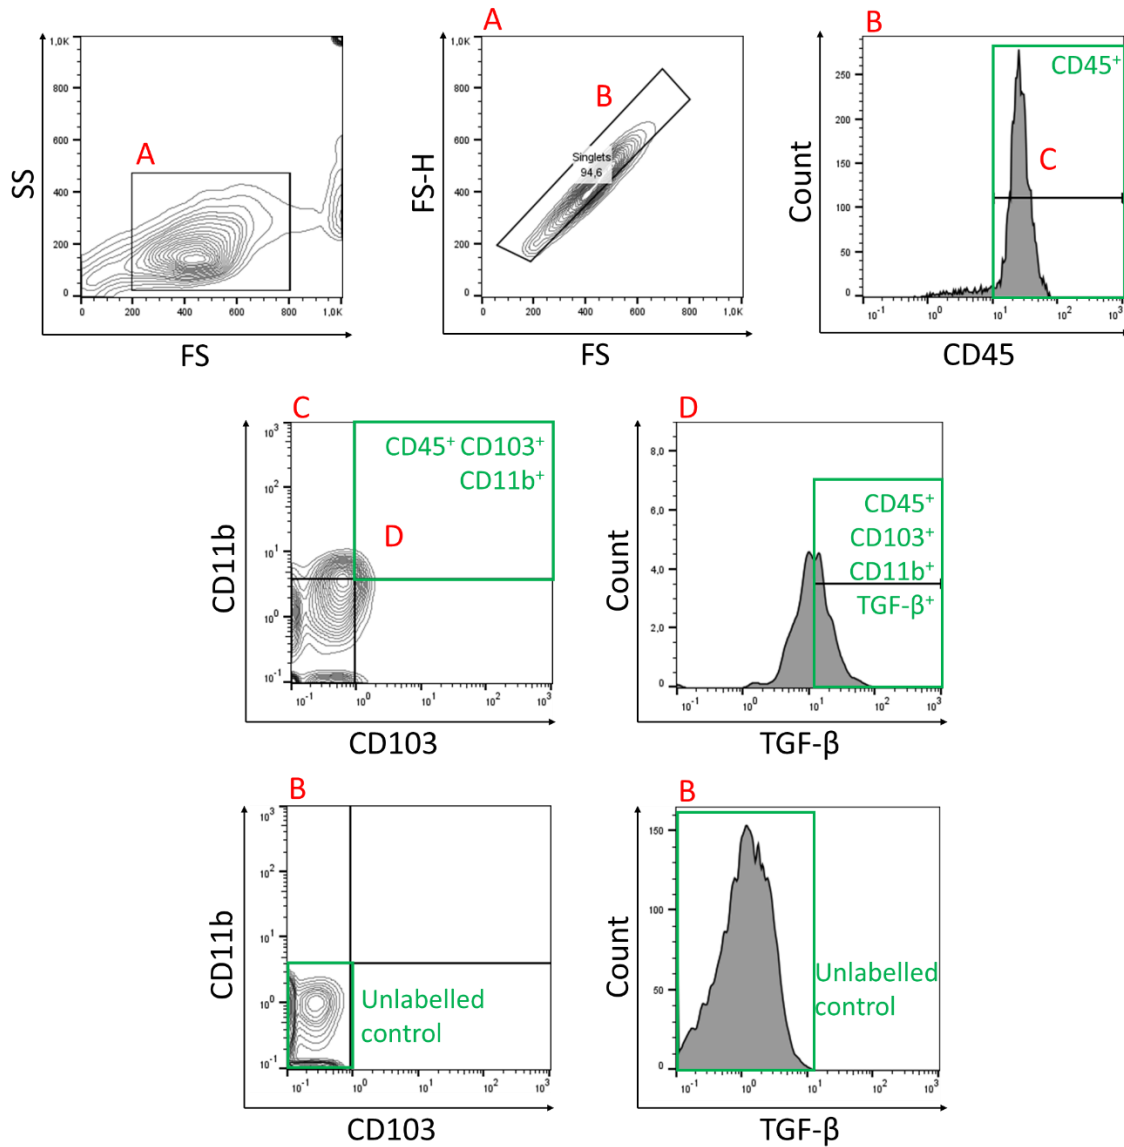

**Figure S5.** The gating strategy for analysis of CD45<sup>+</sup> CD11b<sup>+</sup> CD103<sup>+</sup> cells from MLN *ex vivo* exposed to food-grade SiO<sub>2</sub>. Flow cytometry gating strategy for quantification of CD45<sup>+</sup> CD11b<sup>+</sup> CD103<sup>+</sup> cells (including DC and macrophage subpopulations) from MLN of untreated mice (n=9 per group) *ex vivo* exposed for 48h to various concentrations of *fg*-SiO<sub>2</sub> (0, 6.25, 12.5, 25 and 50 μg/mL) before stimulation for 5h with phorbol 12-myristate 13-acetate (PMA) and ionomycin. The frequency of CD45<sup>+</sup> CD11b<sup>+</sup> CD103<sup>+</sup> cells and CD45<sup>+</sup> CD11b<sup>+</sup> CD103<sup>+</sup> TGF-β<sup>+</sup> cells was evaluated by flow cytometry. SS: side scatter. FS: forward scatter. FS-H: forward scatter height.



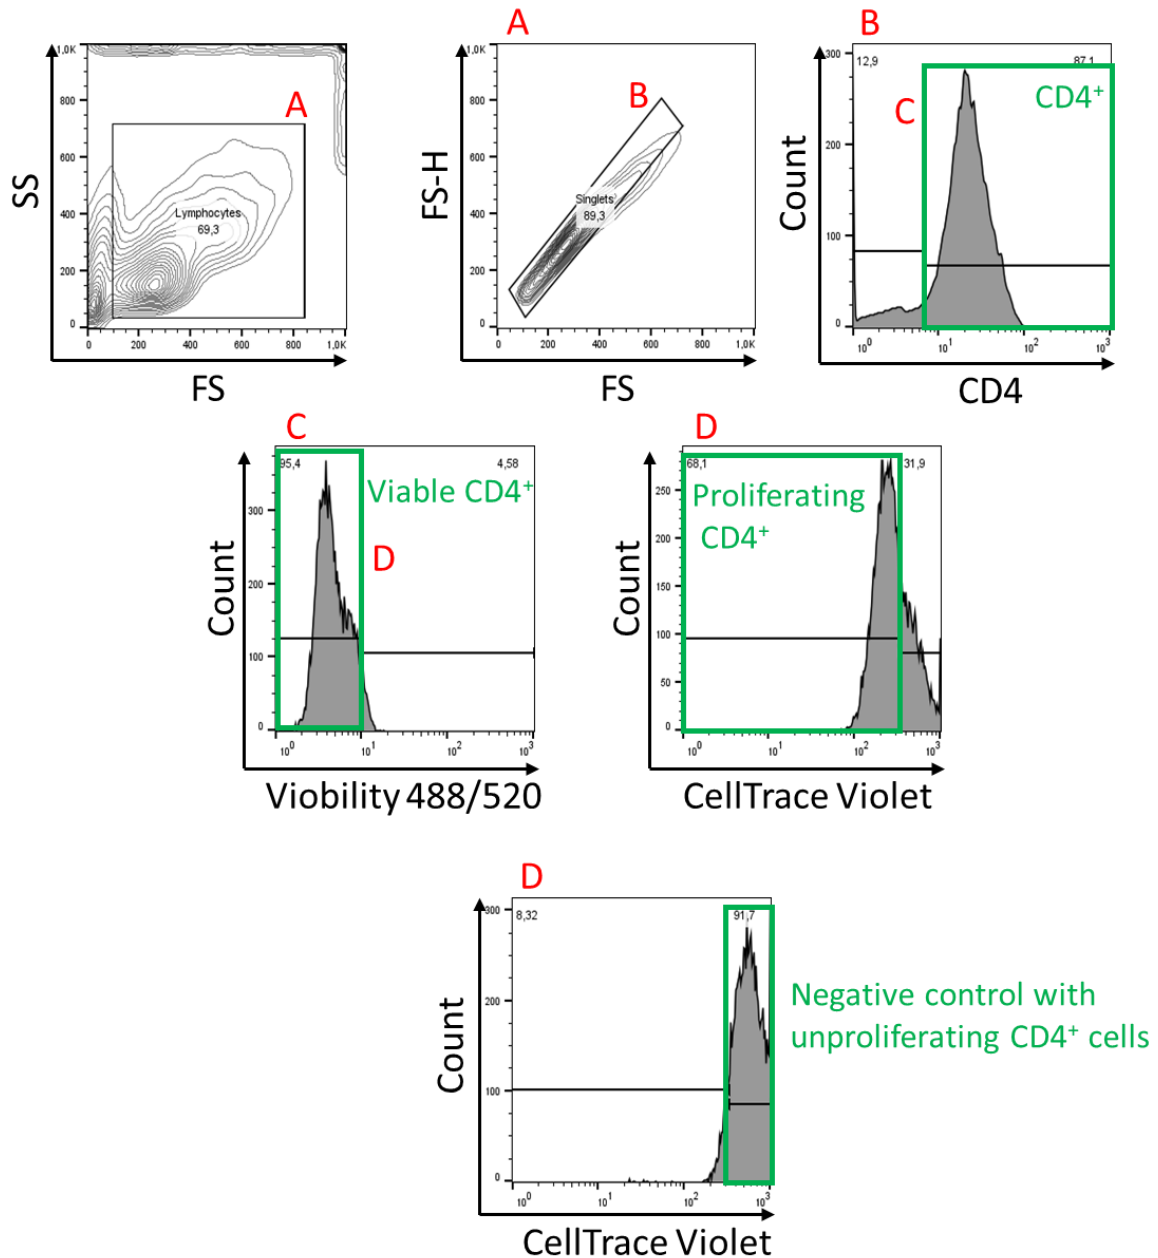

**Figure S6.** The gating strategy for analysis of T cells proliferation. Flow cytometry gating strategy for quantification of CD4<sup>+</sup> proliferating cells isolated from MLN of untreated mice. Cell suspension from MLN of untreated mice were exposed for 3 days to concanavalin-A (a T-cell mitogen) in the absence or presence of various concentrations of *fg*-SiO<sub>2</sub> (0, 6.25, 12.5, 25 and 50 µg/mL). SS: side scatter. FS: forward scatter. FS-H: forward scatter height.

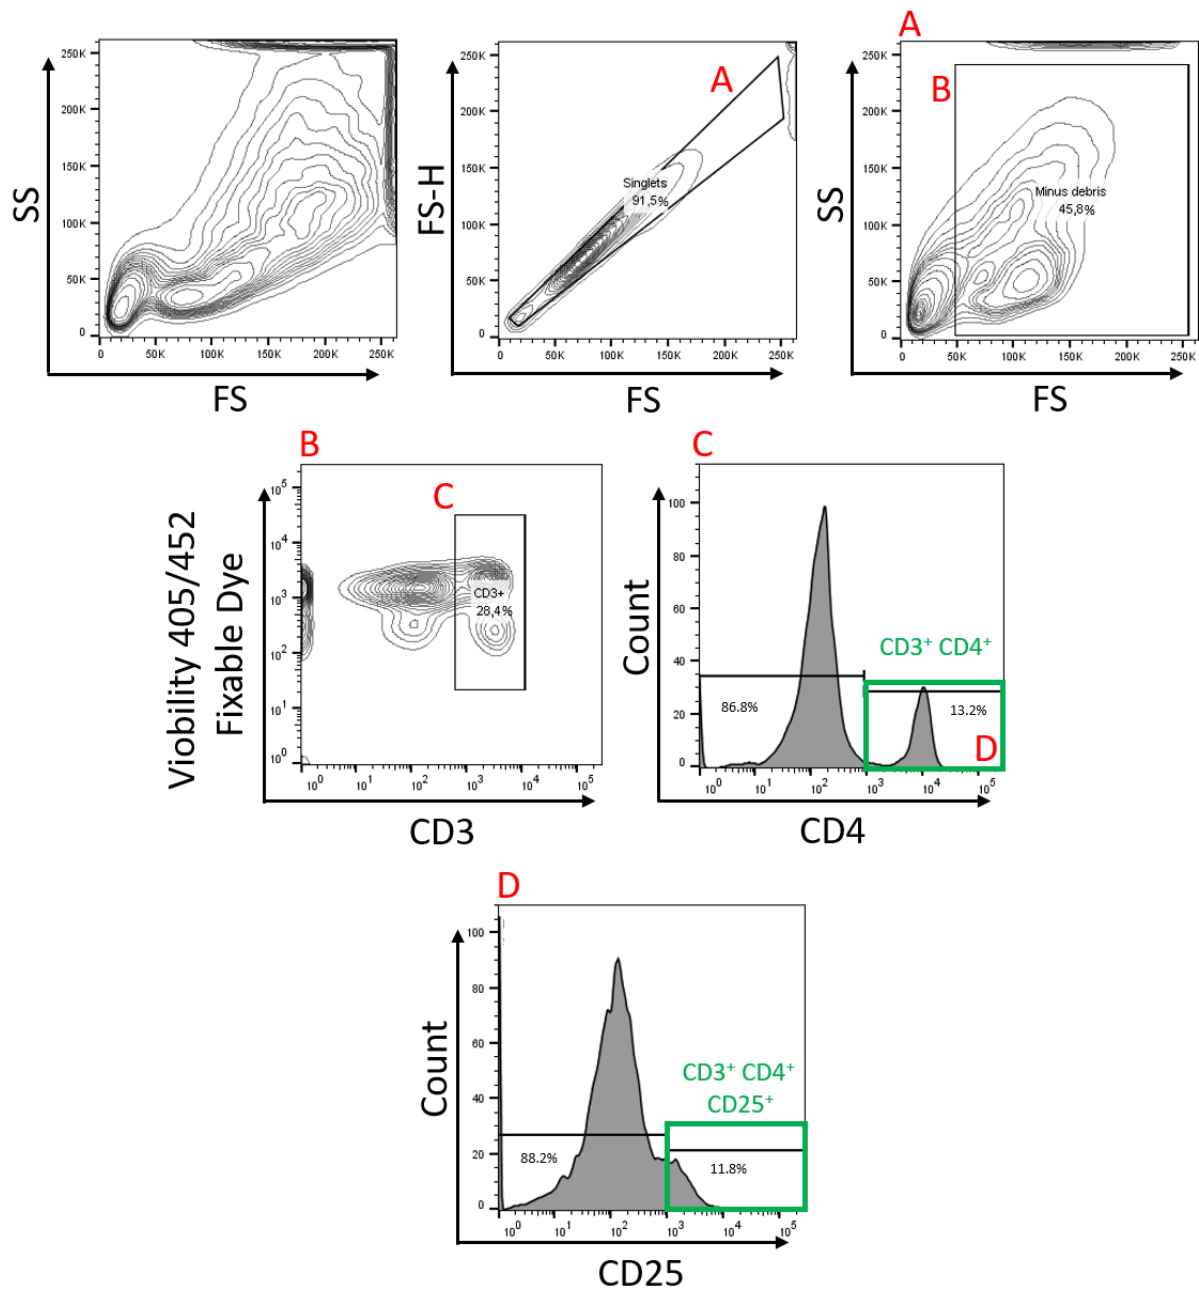

**Figure S7.** The gating strategy for analysis of T cells from colon *lamina propria*. Flow cytometry gating strategy for quantification of CD3<sup>+</sup> CD4<sup>+</sup> and CD3<sup>+</sup> CD4<sup>+</sup> CD25<sup>+</sup> subpopulations isolated from the colon *lamina propria* of OVA-immunized (PBS) or OVA-tolerized mice exposed to a vehicle or *fg*-SiO<sub>2</sub> through gavage (gav) or food. SS: side scatter. FS: forward scatter. FS-H: forward scatter height.

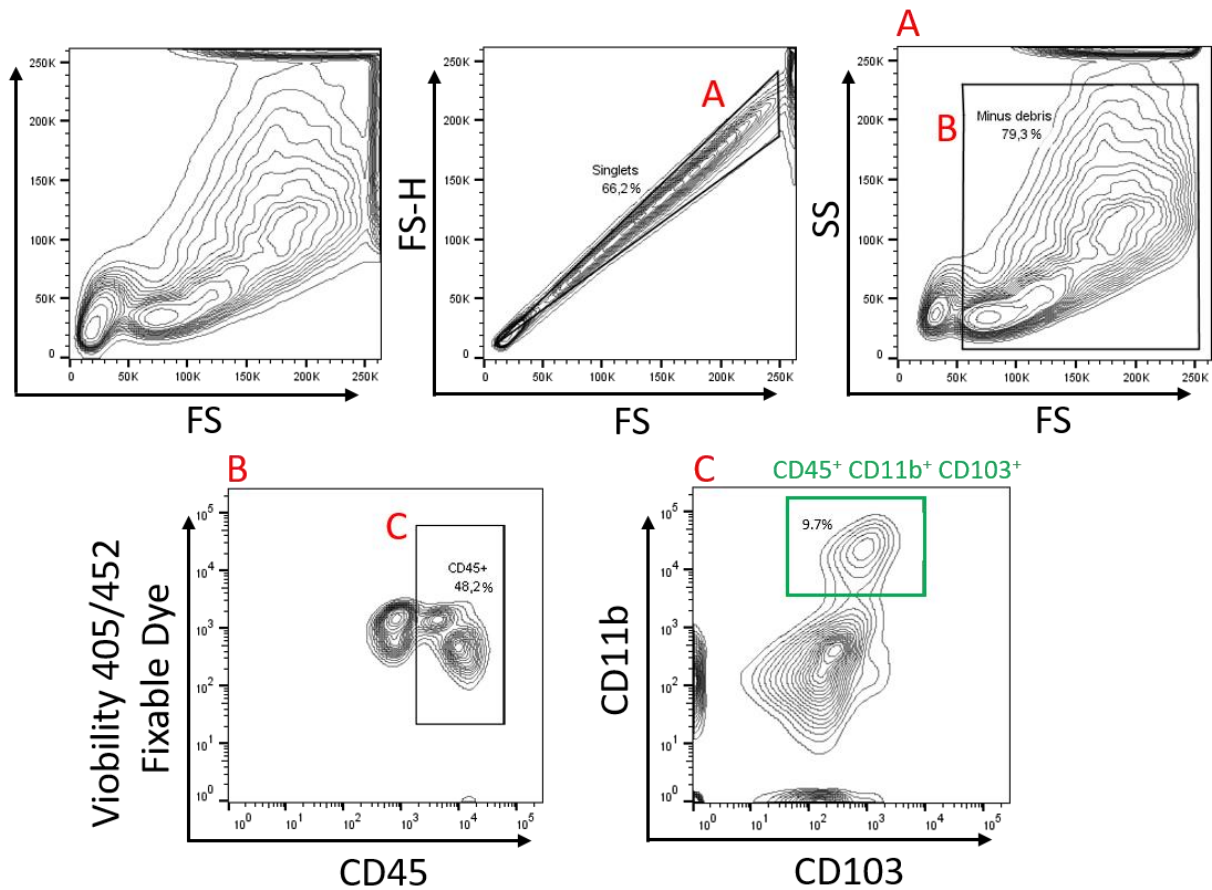

**Figure S8.** The gating strategy for analysis of CD45<sup>+</sup> CD11b<sup>+</sup> CD103<sup>+</sup> cells from colon *lamina propria*. Flow cytometry gating strategy for quantification of CD45<sup>+</sup> CD11b<sup>+</sup> and CD103<sup>+</sup> subpopulations isolated from the colon *lamina propria* of OVA-immunized (PBS) or OVA-tolerized mice exposed to a vehicle or *fg*-SiO<sub>2</sub> through gavage (gav) or food. SS: side scatter. FS: forward scatter. FS-H: forward scatter height.

**Table S1. *fg*-SiO<sub>2</sub> sample characterization by DLS**

| SiO <sub>2</sub><br>sample | Ultrapure water (pH = 7.7) |                  |      |
|----------------------------|----------------------------|------------------|------|
|                            | Zeta potential<br>(mV)     | H. diam.<br>(nm) | PdI  |
| <b>E551</b>                | -25                        | 2406             | 0.20 |

H. diam., hydrodynamic diameter; PdI, polydispersity index.

**Table S2. Oral tolerance and challenge with OVA protocol**

| Day of protocol   | 41-43d                     | 48d                               | 54d                      | 55d-60d                   |
|-------------------|----------------------------|-----------------------------------|--------------------------|---------------------------|
| OVA-tolerized     | Gavage. 20mg<br>OVA in PBS | OVA in<br>CFA+PBS<br>(100µg/s.c.) | IgG anti-OVA<br>in serum | Gavage 25mg<br>OVA in PBS |
| OVA-<br>immunized | Gavage PBS                 | OVA in<br>CFA+PBS<br>(100µg/s.c.) | IgG anti-OVA<br>in serum | Gavage 25mg<br>OVA in PBS |

CFA, complete Freund adjuvant; IgG, immunoglobulin G. OVA, ovalbumin; PBS, phosphate buffered saline; s.c., subcutaneous.

**Table S3. qPCR primers used for gene expression analysis**

|                               |    |                               |
|-------------------------------|----|-------------------------------|
| <i>Rpl19</i>                  | FW | 5'-GAAGGTCAAAGGGAATGTGTTCA-3' |
|                               | RV | 5'-CCTTGTCTGCCTTCAGCTTGT-3'   |
| <i>Il1<math>\beta</math></i>  | FW | 5'-TGTAATGAAAGACGGCACACC-3'   |
|                               | RV | 5'-TCTTCTTTGGGTATTGCTTGG-3'   |
| <i>Il10</i>                   | FW | 5'-AGAAGCATGGCCCAGAAATCA-3'   |
|                               | RV | 5'-GGCCTTGTTAGACACCTTGGT-3'   |
| <i>Ifn<math>\gamma</math></i> | FW | 5'-ATGAACGCTACACACTGCATC-3'   |
|                               | RV | 5'-CCATCCTTTTGCCAGTTCCTG-3'   |
| <i>Tgf<math>\beta</math></i>  | FW | 5'- AGCCCTGGATACCAACTATTGC-3' |
|                               | RV | 5'- CACAGCAGTTCTTCTCTGTGGA-3' |
| <i>Foxp3</i>                  | FW | 5'-CCTGCCTTGGTACATTCGTG-3'    |
|                               | RV | 5'-TGTTGTGGGTGAGTGCTTTG-3'    |
| <i>Il15</i>                   | FW | 5'- CATTTTGGGCTGTGTCAGTG-3'   |
|                               | RV | 5'-GCAATTCCAGGAGAAAGCAG-3'    |
| <i>Il17f</i>                  | FW | 5'-GCCATTCTGAGGGAGGTAGC-3'    |
|                               | RV | 5'-GAGGACAGTTCCCAGCCTTC-3'    |

FW, Forward sequence; RV, Reverse sequence.

**Table S4.** Corresponding numeric data for all figures. Reported is the measured data for all replicates.

Figure 1B (Lcn2 pg/mg of feces)

| <b>0mg/kg</b> | <b>1 mg/kg</b> | <b>10mg/kg</b> | <b>100mg/kg</b> |
|---------------|----------------|----------------|-----------------|
| 32.89         | 134.57         | 190.26         | 127.84          |
| 96.21         | 105.47         | 235.08         | 101.03          |
| 40.83         | 95.38          | 212.09         | 90.08           |
| 19.13         | 80.19          | 209.91         | 189.33          |
| 24.18         | 93.11          | 98.81          | 139.5           |
| 84.08         | 102.69         | 224.33         | 205.52          |
| 44.86         | 75.13          | 176.47         | 104.97          |
| 46.82         | 137.69         | 126.7          | 167.03          |
| 40.97         |                |                |                 |
| 40.33         |                |                |                 |

Figure 1C (IFN $\gamma$  pg/mL)

| <b>0mg/kg</b> | <b>1 mg/kg</b> | <b>10mg/kg</b> | <b>100mg/kg</b> |
|---------------|----------------|----------------|-----------------|
| 24            | 45.2           | 29.3           | 13.7            |
| 19.3          | 34             | 75.2           | 92.2            |
| 23.3          | 32.6           | 68.8           | 35.4            |
| 13.1          | 19.1           | 66.4           | 24.7            |
| 13.2          | 25.7           | 37.5           | 20.5            |
| 18.7          | 12.3           | 43.3           | 36.4            |
| 5.9           | 27.3           | 38.5           | 65.49           |
| 34.1          | 28.03          | 51.29          | 8.81            |
| 3.2           |                |                |                 |
| 27.8          |                |                |                 |

Figure 1D (IL-10 pg/mL)

| <b>0mg/kg</b> | <b>1 mg/kg</b> | <b>10mg/kg</b> | <b>100mg/kg</b> |
|---------------|----------------|----------------|-----------------|
| 1.65          | 0.3            | 0.5            | 0.3             |
| 37            | 0.2            | 0.4            | 0.4             |
| 2.5           | 2.2            | 0.4            | 2.5             |
| 9.9           | 0.6            | 0.2            | 1.2             |
| 12            | 3              | 3.9            | 0.3             |
| 7.5           | 0.4            | 0.9            | 0.2             |
| 21.6          | 2              | 3.2            | 0.5             |
| 2.2           | 0.3            | 3              | 2.6             |
| 2.7           |                |                |                 |
| 3.1           |                |                |                 |

Figure 1E (TGF- $\beta$  pg/mL)

| <b>0mg/kg</b> | <b>1 mg/kg</b> | <b>10mg/kg</b> | <b>100mg/kg</b> |
|---------------|----------------|----------------|-----------------|
| 469.3         | 316.2          | 361.5          | 335             |
| 502.7         | 344.7          | 285.3          | 337.1           |
| 491.8         | 290.3          | 280.2          | 321.7           |
| 470.4         | 280.9          | 308.1          | 310.5           |
| 563.5         | 307.5          | 287.4          | 337.7           |
| 528.4         | 315.3          | 298.8          | 333.1           |
| 513.8         | 289.5          | 249.9          | 284.1           |
| 385.8         | 273.2          | 273.5          | 361.1           |
| 424.35        |                |                |                 |
| 441.3         |                |                |                 |

Figure 2A (TGF- $\beta$  pg/mL)

| <b>0<math>\mu</math>g/mL</b> | <b>6.25<math>\mu</math>g/mL</b> | <b>12.5<math>\mu</math>g/mL</b> | <b>25<math>\mu</math>g/mL</b> | <b>50<math>\mu</math>g/mL</b> |
|------------------------------|---------------------------------|---------------------------------|-------------------------------|-------------------------------|
| 135.3                        | 42.5                            | 47.7                            | 66.3                          | 66.7                          |
| 44.8                         | 43.5                            | 58.5                            | 60.3                          | 64.8                          |
| 57.7                         | 66.7                            | 51.5                            | 68.2                          | 53.8                          |
| 43.8                         | 47.3                            | 57.5                            | 62.7                          | 49.8                          |
| 45.8                         | 66.2                            | 56.5                            | 65.8                          | 49.5                          |
| 48.2                         | 53.3                            | 61.2                            | 61.2                          | 47.3                          |
| 59.8                         | 54.3                            | 54.3                            | 53.8                          | 54.2                          |
|                              |                                 |                                 | 74.8                          | 49.8                          |

Figure 2B (TGF- $\beta$  pg/mL)

| <b>0<math>\mu</math>g/mL</b> | <b>6.25<math>\mu</math>g/mL</b> | <b>12.5<math>\mu</math>g/mL</b> | <b>25<math>\mu</math>g/mL</b> | <b>50<math>\mu</math>g/mL</b> |
|------------------------------|---------------------------------|---------------------------------|-------------------------------|-------------------------------|
| 102.9                        | 83.0                            | 72.5                            | 69.3                          | 110.8                         |
| 83.3                         | 81.1                            | 82.9                            | 91.9                          | 63.4                          |
| 99.8                         | 94.1                            | 73.0                            | 67.0                          | 65.4                          |
| 83.3                         | 97.8                            | 83.1                            | 90.1                          | 69.8                          |
| 93.3                         | 90.9                            | 75.1                            | 82.3                          | 77.8                          |
| 125.4                        | 76.9                            | 81.8                            | 70.1                          | 65.6                          |
| 83.6                         | 87.1                            | 85.1                            | 77.4                          | 66.0                          |
|                              |                                 |                                 | 98.9                          | 92.0                          |



Figure 2C (IL-10 pg/mL)

| 0µg/mL | 6.25µg/mL | 12.5µg/mL | 25µg/mL | 50µg/mL |
|--------|-----------|-----------|---------|---------|
| 4.9    | 2.7       | 3.2       | 3.3     | 2.8     |
| 3.9    | 9.2       | 0.2       | 1.7     | 0.3     |
| 11.8   | 9.2       | 5.3       | 1.4     | 1.5     |
| 8.0    | 0.0       | 3.7       | 0.2     | 0.7     |
| 22.1   | 2.3       | 6.8       | 0.8     | 2.7     |
| 32.3   | 0.7       | 1.0       | 2.9     | 2.3     |
| 7.7    | 9.4       | 4.0       | 1.6     | 1.0     |
|        |           |           | 1.7     | 0.8     |

Figure 2D (IL-10 pg/mL)

| 0µg/mL | 6.25µg/mL | 12.5µg/mL | 25µg/mL | 50µg/mL |
|--------|-----------|-----------|---------|---------|
| 2.8    | 4.4       | 2.2       | 4.4     | 3.6     |
| 3.9    | 3.8       | 2.5       | 5.5     | 2.6     |
| 4.7    | 4.2       | 2.9       | 2.6     | 2.8     |
| 2.3    | 2.8       | 1.9       | 1.9     | 2.4     |
| 9.2    | 2.6       | 2.1       | 4.4     | 6.3     |
| 9.3    | 5.4       | 4.9       | 2.1     | 4.9     |
| 3.3    | 2.4       | 2.5       | 1.9     | 4.4     |
|        |           |           | 3.1     | 2.8     |

Figure 2E (IFN-γ pg/mL)

| 0µg/mL | 6.25µg/mL | 12.5µg/mL | 25µg/mL | 50µg/mL |
|--------|-----------|-----------|---------|---------|
| 10.4   | 5.7       | 10.7      | 12.4    | 7.2     |
| 11.1   | 6.1       | 7.0       | 8.7     | 3.2     |
| 10.5   | 7.2       | 6.8       | 10.0    | 4.0     |
| 7.2    | 11.9      | 13.1      | 15.3    | 30.0    |
| 10.7   | 7.9       | 4.1       | 3.3     | 5.8     |
| 4.5    | 4.5       | 14.9      | 14.1    | 13.0    |
| 6.5    | 6.7       | 6.4       | 8.5     | 4.6     |
|        |           |           | 16.4    | 2.6     |

Figure 2F (IFN- $\gamma$  pg/mL)

| <b>0<math>\mu</math>g/mL</b> | <b>6.25<math>\mu</math>g/mL</b> | <b>12.5<math>\mu</math>g/mL</b> | <b>25<math>\mu</math>g/mL</b> | <b>50<math>\mu</math>g/mL</b> |
|------------------------------|---------------------------------|---------------------------------|-------------------------------|-------------------------------|
| 18.2                         | 17.8                            | 17.6                            | 17.3                          | 17.5                          |
| 18.0                         | 17.5                            | 17.9                            | 17.4                          | 17.3                          |
| 18.0                         | 17.6                            | 17.8                            | 17.2                          | 17.2                          |
| 17.8                         | 18.1                            | 17.6                            | 17.3                          | 17.5                          |
| 17.6                         | 18.0                            | 17.5                            | 18.1                          | 17.2                          |
| 18.0                         | 18.0                            | 17.2                            | 17.2                          | 18.3                          |
| 17.9                         | 17.7                            | 17.4                            | 18.4                          | 18.5                          |
|                              |                                 |                                 | 17.8                          | 17.3                          |

Figure 2G (% of cell CD45<sup>+</sup> CD11b<sup>+</sup> CD103<sup>+</sup> TGF- $\beta$ <sup>+</sup>)

| <b>0<math>\mu</math>g/mL</b> | <b>6.25<math>\mu</math>g/mL</b> | <b>12.5<math>\mu</math>g/mL</b> | <b>25<math>\mu</math>g/mL</b> | <b>50<math>\mu</math>g/mL</b> |
|------------------------------|---------------------------------|---------------------------------|-------------------------------|-------------------------------|
| 42.9                         | 37.5                            | 18.9                            | 10.8                          | 17.6                          |
| 51.7                         | 33.9                            | 16.7                            | 11.6                          | 11.1                          |
| 36.4                         | 30.4                            | 13.1                            | 8.7                           | 10.0                          |
| 26.5                         | 18.6                            | 11.5                            | 8.8                           | 8.3                           |
| 30.1                         | 20.0                            | 10.2                            | 10.5                          | 10.7                          |
| 31.9                         | 13.4                            | 20.4                            | 4.0                           | 10.3                          |
| 30.1                         | 25.2                            | 7.7                             | 10.1                          | 5.6                           |
| 18.2                         | 22.4                            | 7.2                             | 8.9                           | 8.0                           |
| 25.0                         | 24.6                            | 10.2                            | 6.8                           | 13.9                          |

Figure 2H (% of cell CD4<sup>+</sup> CD3<sup>+</sup> Foxp3<sup>+</sup> IL-10<sup>+</sup>)

| <b>0<math>\mu</math>g/mL</b> | <b>6.25<math>\mu</math>g/mL</b> | <b>12.5<math>\mu</math>g/mL</b> | <b>25<math>\mu</math>g/mL</b> | <b>50<math>\mu</math>g/mL</b> |
|------------------------------|---------------------------------|---------------------------------|-------------------------------|-------------------------------|
| 2.9                          | 1.1                             | 1.0                             | 0.6                           | 0.7                           |
| 1.9                          | 1.5                             | 0.7                             | 0.8                           | 0.0                           |
| 1.5                          | 0.4                             | 0.4                             | 0.0                           | 1.0                           |
| 1.8                          | 0.6                             | 0.5                             | 0.7                           | 0.1                           |
| 1.9                          | 0.2                             | 0.1                             | 0.8                           | 0.6                           |
| 1.1                          | 0.2                             | 0.1                             | 0.4                           | 1.7                           |
| 1.6                          | 0.3                             | 0.1                             | 0.0                           | 0.5                           |
| 2.1                          | 1.0                             | 0.1                             | 0.4                           | 1.3                           |
| 0.9                          | 0.7                             | 0.9                             | 0.3                           | 1.1                           |

Figure 2I (% of cell CD4<sup>+</sup> CD3<sup>+</sup> Tbet<sup>+</sup> IFN- $\gamma$ <sup>+</sup>)

| <b>0<math>\mu</math>g/mL</b> | <b>6.25<math>\mu</math>g/mL</b> | <b>12.5<math>\mu</math>g/mL</b> | <b>25<math>\mu</math>g/mL</b> | <b>50<math>\mu</math>g/mL</b> |
|------------------------------|---------------------------------|---------------------------------|-------------------------------|-------------------------------|
| 1.2                          | 1.2                             | 1.5                             | 1.9                           | 0.9                           |
| 0.7                          | 1.1                             | 0.9                             | 0.4                           | 0.9                           |
| 1.6                          | 0.7                             | 1.1                             | 1.0                           | 0.5                           |
| 1.6                          | 1.3                             | 0.7                             | 1.6                           | 0.6                           |
| 1.3                          | 1.3                             | 0.7                             | 2.8                           | 0.2                           |
| 1.0                          | 0.5                             | 1.5                             | 1.2                           | 1.5                           |
| 0.7                          | 0.7                             | 1.3                             | 0.5                           | 1.4                           |
| 0.8                          | 1.2                             | 1.1                             | 1.1                           | 1.8                           |
| 1.1                          | 1.9                             | 1.2                             | 1.1                           | 0.7                           |

Figure 2J (% of proliferating CD4<sup>+</sup> cells)

| <b>0<math>\mu</math>g/mL</b> | <b>6.25<math>\mu</math>g/mL</b> | <b>12.5<math>\mu</math>g/mL</b> | <b>25<math>\mu</math>g/mL</b> | <b>50<math>\mu</math>g/mL</b> |
|------------------------------|---------------------------------|---------------------------------|-------------------------------|-------------------------------|
| 66.4                         | 58.8                            | 50                              | 59.6                          | 50                            |
| 65.5                         | 60.2                            | 54.6                            | 59.1                          | 62.5                          |
| 68.1                         | 66                              | 61.1                            | 61.5                          | 65.1                          |
| 73.8                         | 55.9                            | 52.2                            | 51.7                          | 49.2                          |
| 59.7                         | 58.8                            | 57.6                            | 55.3                          | 51.9                          |
| 61.8                         | 62.4                            | 57.6                            | 58.5                          | 58.5                          |
| 60.4                         | 57.1                            | 55.6                            | 53.9                          | 53.9                          |

Figure 3B (OD 450 nm)

| <b>PBS</b>    | <b>OVA</b>    | <b>OVA</b>     | <b>OVA</b>     | <b>OVA</b>      |
|---------------|---------------|----------------|----------------|-----------------|
| <b>0mg/kg</b> | <b>0mg/kg</b> | <b>1 mg/kg</b> | <b>10mg/kg</b> | <b>100mg/kg</b> |
| 0.65          | 0.06          | 0.31           | 0.39           | 0.31            |
| 0.53          | 0.07          | 0.50           | 0.11           | 0.47            |
| 0.62          | 0.06          | 0.30           | 0.86           | 0.63            |
| 0.75          | 0.05          | 0.68           | 0.58           | 0.55            |
| 0.63          | 0.06          | 0.41           | 0.43           | 0.54            |
| 0.63          | 0.14          | 0.27           | 0.63           | 0.63            |
| 0.62          | 0.06          | 0.72           | 0.43           | 0.38            |

Figure 3C (Lcn2 pg/mL of feces)

| <b>PBS</b>    | <b>OVA</b>    | <b>OVA</b>     | <b>OVA</b>     | <b>OVA</b>      |
|---------------|---------------|----------------|----------------|-----------------|
| <b>0mg/kg</b> | <b>0mg/kg</b> | <b>1 mg/kg</b> | <b>10mg/kg</b> | <b>100mg/kg</b> |
| 7854.3        | 885.2         | 1086.1         | 1976.1         | 2273.1          |
| 4685.2        | 1511.6        | 1885.8         | 2093.4         | 4767.5          |
| 1800.6        | 2553.3        | 2485.2         | 7529.0         | 2589.0          |
| 3527.2        | 868.5         | 3823.4         | 5107.1         | 6450.9          |
| 3215.3        | 1960.0        | 2328.8         | 4380.8         | 15831.6         |
| 6132.3        | 1645.6        | 1900.4         | 3823.7         | 10752.8         |
| 4073.8        | 554.4         | 1481.5         | 1844.0         | 3259.7          |

Figure 3D (*Il1 $\beta$*  relative expression)

| <b>PBS</b>    | <b>OVA</b>    | <b>OVA</b>     | <b>OVA</b>     | <b>OVA</b>      |
|---------------|---------------|----------------|----------------|-----------------|
| <b>0mg/kg</b> | <b>0mg/kg</b> | <b>1 mg/kg</b> | <b>10mg/kg</b> | <b>100mg/kg</b> |
| 3.39          | 1.45          | 8.10           | 2.71           | 15.10           |
| 2.00          | 1.79          | 2.43           | 2.97           | 15.42           |
| 3.43          | 0.90          | 1.59           | 2.00           | 2.62            |
| 2.07          | 0.76          | 2.10           | 3.87           | 2.25            |
| 2.78          | 0.10          | 5.39           | 4.59           | 2.54            |
| 11.62         | 0.35          | 7.50           | 1.71           | 1.50            |
| 4.22          | 1.65          | 1.31           | 2.52           | 2.48            |

Figure 3E (IFN- $\gamma$  pg/mL)

| <b>PBS</b>    | <b>OVA</b>    | <b>OVA</b>     | <b>OVA</b>     | <b>OVA</b>      |
|---------------|---------------|----------------|----------------|-----------------|
| <b>0mg/kg</b> | <b>0mg/kg</b> | <b>1 mg/kg</b> | <b>10mg/kg</b> | <b>100mg/kg</b> |
| 4.9           | 5.0           | 4.9            | 12.4           | 11.9            |
| 14.9          | 5.0           | 5.5            | 3.8            | 9.9             |
| 8.1           | 6.4           | 14.1           | 11.0           | 6.3             |
| 17.0          | 3.4           | 6.4            | 21.7           | 3.5             |
| 18.0          | 0.5           | 6.8            | 13.0           | 9.1             |
| 9.6           | 2.7           | 20.1           | 18.7           | 11.3            |
| 11.4          | 4.5           | 9.6            | 6.0            | 8.7             |

Figure 3F (*Il10* relative expression)

| <b>PBS</b>    | <b>OVA</b>    | <b>OVA</b>     | <b>OVA</b>     | <b>OVA</b>      |
|---------------|---------------|----------------|----------------|-----------------|
| <b>0mg/kg</b> | <b>0mg/kg</b> | <b>1 mg/kg</b> | <b>10mg/kg</b> | <b>100mg/kg</b> |
| 0.15          | 1.83          | 0.65           | 0.18           | 0.32            |
| 0.22          | 0.22          | 0.14           | 0.28           | 0.01            |
| 0.02          | 0.11          | 0.06           | 0.06           | 0.22            |
| 0.30          | 1.01          | 0.28           | 0.07           | 0.04            |
| 0.16          | 0.42          | 0.04           | 0.02           | 0.06            |
| 0.16          | 2.42          | 0.07           | 0.05           | 0.05            |
| 0.09          | 1.00          | 0.01           | 0.07           | 0.06            |

Figure 3G (*Tgfβ* relative expression)

| <b>PBS</b>    | <b>OVA</b>    | <b>OVA</b>     | <b>OVA</b>     | <b>OVA</b>      |
|---------------|---------------|----------------|----------------|-----------------|
| <b>0mg/kg</b> | <b>0mg/kg</b> | <b>1 mg/kg</b> | <b>10mg/kg</b> | <b>100mg/kg</b> |
| 0.46          | 1.25          | 0.77           | 0.7            | 0.24            |
| 0.47          | 2.02          | 0.71           | 0.39           | 0.44            |
| 0.41          | 0.49          | 0.48           | 0.31           | 0.53            |
| 0.52          | 0.47          | 0.04           | 0.5            | 0.59            |
| 0.03          | 0.78          | 0.51           | 0.33           | 0.31            |
| 0.47          | 0.77          | 0.37           | 0.5            | 0.43            |
| 0.38          | 1.22          | 0.23           | 0.48           | 0.42            |

Figure 3H (IL-10 pg/mL)

| <b>PBS</b>    | <b>OVA</b>    | <b>OVA</b>     | <b>OVA</b>     | <b>OVA</b>      |
|---------------|---------------|----------------|----------------|-----------------|
| <b>0mg/kg</b> | <b>0mg/kg</b> | <b>1 mg/kg</b> | <b>10mg/kg</b> | <b>100mg/kg</b> |
| 3.4           | 5.5           | 5.1            | 5.6            | 5.6             |
| 5.5           | 7.6           | 3.9            | 1.4            | 2.5             |
| 6.0           | 3.4           | 2.6            | 4.6            | 0.6             |
| 1.8           | 4.0           | 0.1            | 0.7            | 1.2             |
| 0.9           | 8.1           | 4.9            | 1.6            | 4.8             |
| 2.4           | 6.6           | 0.4            | 3.4            | 2.7             |
| 3.3           | 7.3           | 1.9            | 4.3            | 3.7             |

Figure 3I (TGF- $\beta$  pg/mL)

| <b>PBS</b>    | <b>OVA</b>    | <b>OVA</b>     | <b>OVA</b>     | <b>OVA</b>      |
|---------------|---------------|----------------|----------------|-----------------|
| <b>0mg/kg</b> | <b>0mg/kg</b> | <b>1 mg/kg</b> | <b>10mg/kg</b> | <b>100mg/kg</b> |
| 156.1         | 208.8         | 94.6           | 161.5          | 265.4           |
| 168.9         | 307.9         | 69.8           | 50.5           | 221.2           |
| 129.2         | 310.1         | 88.1           | 134.6          | 196.4           |
| 83.6          | 241.6         | 148.4          | 128.9          | 77.5            |
| 142.6         | 360.6         | 193.2          | 53.2           | 128.2           |
| 129.0         | 356.9         | 243.3          | 106.3          | 231.6           |
| 230.0         | 358.5         | 184.7          | 26.6           | 197.5           |

Figure 3J (TGF- $\beta$  pg/mL of tissue)

| <b>PBS</b>    | <b>OVA</b>    | <b>OVA</b>     | <b>OVA</b>     | <b>OVA</b>      |
|---------------|---------------|----------------|----------------|-----------------|
| <b>0mg/kg</b> | <b>0mg/kg</b> | <b>1 mg/kg</b> | <b>10mg/kg</b> | <b>100mg/kg</b> |
| 3.0           | 4.8           | 3.3            | 3.0            | 5.2             |
| 2.5           | 7.7           | 4.2            | 3.7            | 3.1             |
| 1.4           | 5.8           | 2.4            | 3.4            | 0.7             |
| 4.7           | 4.6           | 3.1            | 4.3            | 2.1             |
| 0.2           | 7.3           | 0.9            | 2.1            | 2.3             |
| 3.2           | 8.1           | 1.0            | 1.4            | 1.7             |
| 2.4           | 4.4           | 3.0            | 2.5            | 1.6             |

Figure 4B (OD 450 nm)

| <b>PBS</b>    | <b>OVA</b>    | <b>OVA</b>            | <b>OVA</b>           |
|---------------|---------------|-----------------------|----------------------|
| <b>0mg/kg</b> | <b>0mg/kg</b> | <b>10mg/kg (food)</b> | <b>10mg/kg (gav)</b> |
| 0.80          | 0.06          | 0.36                  | 0.82                 |
| 0.24          | 0.07          | 0.81                  | 0.58                 |
| 0.86          | 0.11          | 1.06                  | 0.38                 |
| 0.59          | 0.06          | 0.72                  | 1.73                 |
| 0.38          | 0.08          | 0.57                  | 1.20                 |
| 0.93          | 0.06          | 0.68                  | 0.48                 |
| 0.69          | 0.05          | 0.90                  | 1.19                 |

Figure 4C (Lcn2 pg/mL of feces)

| <b>PBS</b>    | <b>OVA</b>    | <b>OVA</b>            | <b>OVA</b>           |
|---------------|---------------|-----------------------|----------------------|
| <b>0mg/kg</b> | <b>0mg/kg</b> | <b>10mg/kg (food)</b> | <b>10mg/kg (gav)</b> |
| 1814.1        | 1337.0        | 5314.7                | 5138.0               |
| 2346.4        | 449.2         | 3696.9                | 4359.5               |
| 1557.9        | 151.0         | 1968.7                | 3742.2               |
| 2593.7        | 812.5         | 2690.4                | 3424.2               |
| 3332.5        | 767.2         | 1742.3                | 1993.0               |
| 2681.0        | 651.3         | 1296.7                | 1488.3               |
| 2108.9        | 1875.9        | 3027.7                | 2496.5               |

Figure 4D (IFN- $\gamma$  pg/mL)

| <b>PBS</b>    | <b>OVA</b>    | <b>OVA</b>            | <b>OVA</b>           |
|---------------|---------------|-----------------------|----------------------|
| <b>0mg/kg</b> | <b>0mg/kg</b> | <b>10mg/kg (food)</b> | <b>10mg/kg (gav)</b> |
| 31.0          | 7.3           | 55.6                  | 27.3                 |
| 87.7          | 6.1           | 64.5                  | 55.9                 |
| 61.6          | 42.1          | 77.5                  | 41.8                 |
| 36.7          | 26.4          | 37.4                  | 78.3                 |
| 57.5          | 47.8          | 97.2                  | 25.3                 |
| 51.7          | 7.1           | 42.9                  | 24.2                 |
| 73.8          | 7.5           | 25.5                  | 55.6                 |

Figure 4E (IL-10 pg/mL)

| <b>PBS</b>    | <b>OVA</b>    | <b>OVA</b>            | <b>OVA</b>           |
|---------------|---------------|-----------------------|----------------------|
| <b>0mg/kg</b> | <b>0mg/kg</b> | <b>10mg/kg (food)</b> | <b>10mg/kg (gav)</b> |
| 44.8          | 25.8          | 24.0                  | 20.6                 |
| 15.2          | 45.7          | 33.4                  | 17.9                 |
| 13.6          | 63.9          | 6.9                   | 10.6                 |
| 1.4           | 93.1          | 29.2                  | 13.4                 |
| 5.1           | 42.7          | 24.4                  | 57.3                 |
| 18.1          | 45.5          | 23.2                  | 12.2                 |
| 20.8          | 52.8          | 40.3                  | 5.6                  |

Figure 4F (TGF- $\beta$  pg/mL)

| <b>PBS</b>    | <b>OVA</b>    | <b>OVA</b>            | <b>OVA</b>           |
|---------------|---------------|-----------------------|----------------------|
| <b>0mg/kg</b> | <b>0mg/kg</b> | <b>10mg/kg (food)</b> | <b>10mg/kg (gav)</b> |
| 16.7          | 169.5         | 67.8                  | 80.2                 |
| 11.5          | 253.6         | 84.7                  | 43.0                 |
| 13.2          | 61.7          | 82.8                  | 12.7                 |
| 2.9           | 72.3          | 31.0                  | 15.5                 |
| 69.6          | 163.5         | 93.7                  | 30.0                 |
| 90.8          | 158.1         | 53.1                  | 58.0                 |
| 49.5          | 112.6         | 71.8                  | 89.4                 |

Figure 4G (% of cell CD3<sup>+</sup> CD4<sup>+</sup>)

| <b>PBS</b>    | <b>OVA</b>    | <b>OVA</b>            | <b>OVA</b>           |
|---------------|---------------|-----------------------|----------------------|
| <b>0mg/kg</b> | <b>0mg/kg</b> | <b>10mg/kg (food)</b> | <b>10mg/kg (gav)</b> |
| 4.5           | 9.6           | 3.9                   | 5.1                  |
| 2.6           | 6.4           | 4.0                   | 4.8                  |
| 7.4           | 9.5           | 4.5                   | 8.3                  |
| 5.3           | 13.2          | 6.7                   | 6.3                  |
| 7.1           | 9.6           | 3.2                   | 7.1                  |

Figure 4H (% of cell CD3<sup>+</sup> CD4<sup>+</sup> CD25<sup>+</sup>)

| <b>PBS</b>    | <b>OVA</b>    | <b>OVA</b>            | <b>OVA</b>           |
|---------------|---------------|-----------------------|----------------------|
| <b>0mg/kg</b> | <b>0mg/kg</b> | <b>10mg/kg (food)</b> | <b>10mg/kg (gav)</b> |
| 8.8           | 25.9          | 11.2                  | 18.4                 |
| 9.5           | 29.5          | 15.2                  | 17.2                 |
| 11.8          | 27.0          | 20.3                  | 20.0                 |
| 12.3          | 26.1          | 16.7                  | 18.8                 |
| 19.3          | 21.0          | 12.6                  | 19.7                 |

Figure 4I (*foxp3* relative expression)

| <b>PBS</b>    | <b>OVA</b>    | <b>OVA</b>            | <b>OVA</b>           |
|---------------|---------------|-----------------------|----------------------|
| <b>0mg/kg</b> | <b>0mg/kg</b> | <b>10mg/kg (food)</b> | <b>10mg/kg (gav)</b> |
| 0.58          | 0.85          | 0.52                  | 0.39                 |
| 0.37          | 0.98          | 0.55                  | 0.26                 |
| 0.52          | 1.34          | 0.58                  | 0.79                 |
| 0.53          | 0.88          | 0.6                   | 0.27                 |
| 0.63          | 0.95          | 0.61                  | 0.27                 |



Figure 4J (% of cell CD45<sup>+</sup> CD11b<sup>+</sup> CD103<sup>+</sup>)

| <b>PBS</b>    | <b>OVA</b>    | <b>OVA</b>            | <b>OVA</b>           |
|---------------|---------------|-----------------------|----------------------|
| <b>0mg/kg</b> | <b>0mg/kg</b> | <b>10mg/kg (food)</b> | <b>10mg/kg (gav)</b> |
| 1.2           | 7.9           | 8.6                   | 2.5                  |
| 6.8           | 8.9           | 5.5                   | 2.1                  |
| 5.7           | 8.1           | 5.4                   | 6.5                  |
| 7.9           | 9.7           | 9.7                   | 6.4                  |
| 5.4           | 9.2           | 7.1                   | 7.5                  |

Figure 5B (OD 450 nm)

| <b>Day 60</b> | <b>Day 60</b>  | <b>Day 75</b> | <b>Day 75</b>  |
|---------------|----------------|---------------|----------------|
| <b>0mg/kg</b> | <b>10mg/kg</b> | <b>0mg/kg</b> | <b>10mg/kg</b> |
| 0.7           | 2.2            | 1.8           | 1.2            |
| 1.0           | 1.1            | 0.3           | 0.8            |
| 1.0           | 0.7            | 0.9           | 0.9            |
| 0.8           | 0.4            | 1.6           | 1.6            |
| 2.4           | 1.0            | 0.5           | 0.5            |
|               |                | 0.6           | 2.1            |

Figure 5C (OD 450 nm)

| <b>Day 60</b> | <b>Day 60</b>  | <b>Day 75</b> | <b>Day 75</b>  |
|---------------|----------------|---------------|----------------|
| <b>0mg/kg</b> | <b>10mg/kg</b> | <b>0mg/kg</b> | <b>10mg/kg</b> |
| 0.4           | 0.6            | 0.8           | 0.3            |
| 0.3           | 0.5            | 0.1           | 0.4            |
| 0.5           | 0.4            | 0.5           | 0.5            |
| 1.0           | 0.2            | 0.5           | 1.6            |
| 0.3           | 0.2            | 0.2           | 0.3            |
|               |                | 0.3           | 0.2            |

Figure 5D (V/C ratio)

| <b>Day 60</b> | <b>Day 60</b>  | <b>Day 75</b> | <b>Day 75</b>  |
|---------------|----------------|---------------|----------------|
| <b>0mg/kg</b> | <b>10mg/kg</b> | <b>0mg/kg</b> | <b>10mg/kg</b> |
| 6.4           | 6.4            | 7.4           | 5.5            |
| 6.3           | 6.2            | 7.6           | 6.4            |
| 7.2           | 6.4            | 6.4           | 5.9            |
| 7.6           |                | 7.2           | 6.2            |
| 6.2           | 7.5            | 6.5           | 5.5            |
|               |                | 6.4           | 5.2            |

Figure 5F (IELs/100 EC)

| <b>Day 60</b><br><b>0mg/kg</b> | <b>Day 60</b><br><b>10mg/kg</b> | <b>Day 75</b><br><b>0mg/kg</b> | <b>Day 75</b><br><b>10mg/kg</b> |
|--------------------------------|---------------------------------|--------------------------------|---------------------------------|
| 7                              | 8                               | 5                              | 11.5                            |
| 3                              | 6                               | 5.5                            | 16.5                            |
| 5                              | 5.5                             | 6                              |                                 |
| 5                              | 6.5                             | 6                              | 11                              |
| 4                              | 5                               | 7.5                            | 17.5                            |
|                                |                                 | 5                              | 12                              |

Figure 5H (*Ifn $\gamma$*  relative expression)

| <b>0mg/kg</b> | <b>10mg/kg</b> |
|---------------|----------------|
| 0.47          | 2.00           |
| 0.60          | 2.34           |
| 2.21          | 3.59           |
| 0.86          | 2.04           |
| 0.27          | 2.14           |
| 1.59          | 2.20           |

Figure 5I (*Il17f* relative expression)

| <b>0mg/kg</b> | <b>10mg/kg</b> |
|---------------|----------------|
| 1.49          | 30.82          |
| 0.64          | 5.38           |
| 0.71          | 32.91          |
| 1.61          | 47.41          |
| 0.61          | 4.08           |
| 0.94          | 41.93          |

Figure 5J (*Il15* relative expression)

| <b>0mg/kg</b> | <b>10mg/kg</b> |
|---------------|----------------|
| 0.80          | 1.25           |
| 1.30          | 1.50           |
| 1.05          | 0.70           |
| 1.11          | 0.92           |
| 0.95          | 0.88           |
| 0.80          | 0.49           |

Figure 5K (*Il1 $\beta$*  relative expression)

| <b>0mg/kg</b> | <b>10mg/kg</b> |
|---------------|----------------|
| 0.94          | 1.07           |
| 0.83          | 1.67           |
| 1.08          | 1.46           |
| 0.94          | 0.95           |
| 1.23          | 0.65           |
| 1.03          | 0.42           |

Figure 5L (*Il10* relative expression)

| <b>0mg/kg</b> | <b>10mg/kg</b> |
|---------------|----------------|
| 1.41          | 1.35           |
| 1.72          | 0.61           |
| 0.71          | 1.62           |
| 0.62          | 1.27           |
| 0.70          | 3.18           |
| 0.84          | 1.62           |

Figure 5M (*Tgfb $\beta$*  relative expression)

| <b>0mg/kg</b> | <b>10mg/kg</b> |
|---------------|----------------|
| 1.00          | 0.62           |
| 0.99          | 2.59           |
| 1.09          | 0.50           |
| 0.69          | 0.77           |
| 1.27          | 1.13           |
| 0.96          | 1.26           |

Figure S2A (FITC dextran flux (nmol.cm<sup>-2</sup>.h<sup>-1</sup>))

| <b>0mg/kg</b> | <b>1mg/kg</b> | <b>10mg/kg</b> | <b>100mg/kg</b> |
|---------------|---------------|----------------|-----------------|
| 0.80          | 0.74          | 0.38           | 0.25            |
| 0.47          | 0.28          | 0.65           | 0.14            |
| 0.26          | 0.09          | 0.24           | 0.60            |
| 0.55          | 0.31          | 0.58           | 0.20            |
| 0.13          | 0.29          | 0.23           | 0.04            |
| 0.19          | 0.46          | 0.26           | 0.42            |
| 0.21          | 0.14          | 0.15           | 0.49            |
| 0.40          | 0.24          | 0.32           | 0.37            |
| 0.67          |               |                |                 |
| 0.31          |               |                |                 |

Figure S2B (FITC dextran flux (nmol.cm<sup>-2</sup>.h<sup>-1</sup>))

| <b>0mg/kg</b> | <b>1mg/kg</b> | <b>10mg/kg</b> | <b>100mg/kg</b> |
|---------------|---------------|----------------|-----------------|
| 0.02          | 0.06          | 0.45           | 0.61            |
| 0.31          | 0.10          | 0.10           | 0.08            |
| 0.07          | 0.16          | 0.21           | 0.03            |
| 0.25          | 0.21          | 0.31           | 0.31            |
| 0.69          | 0.01          | 0.34           | 0.24            |
| 0.44          | 0.13          | 0.02           | 0.16            |
| 0.16          | 0.27          | 0.16           | 0.16            |
| 0.09          | 0.58          | 0.18           | 0.20            |
| 0.10          |               |                |                 |
| 0.03          |               |                |                 |

Figure S3A (% of viable cells normalized to control)

| <b>0µg/mL</b> | <b>6.25µg/mL</b> | <b>12.5µg/mL</b> | <b>25µg/mL</b> | <b>50µg/mL</b> |
|---------------|------------------|------------------|----------------|----------------|
| 109.01        | 108.39           | 99.69            | 104.66         | 100.62         |
| 102.48        | 105.59           | 91.61            | 100.93         | 100.31         |
| 96.27         | 98.76            | 94.10            | 100.62         | 97.52          |
| 92.24         | 86.34            | 92.86            | 89.44          | 96.27          |

Figure S3B (% of cell CD3<sup>+</sup> CD4<sup>+</sup>)

| 0µg/mL | 6.25µg/mL | 12.5µg/mL | 25µg/mL | 50µg/mL |
|--------|-----------|-----------|---------|---------|
| 23.5   | 23.5      | 26.3      | 31.1    | 28.2    |
| 27.5   | 32        | 28.4      | 27.2    | 26.6    |
| 32.4   | 24.8      | 34.2      | 29.9    | 26      |
| 27.9   | 25.8      | 29.2      | 26.7    | 27.8    |
| 28.8   | 24.7      | 26.5      | 26.8    | 26.5    |
| 26.5   | 24.7      | 26.1      | 27.9    | 27.9    |
| 30.9   | 26.9      | 25.5      | 31.1    | 30.2    |
| 26.2   | 25.6      | 28.6      | 27.2    | 26.9    |
| 29.2   | 29.1      | 30.6      | 26.8    | 30.9    |

Figure S3C (% of cell CD3<sup>+</sup> CD4<sup>+</sup> CD25<sup>+</sup>)

| 0µg/mL | 6.25µg/mL | 12.5µg/mL | 25µg/mL | 50µg/mL |
|--------|-----------|-----------|---------|---------|
| 9.4    | 9.8       | 11.8      | 9.7     | 10.4    |
| 7.7    | 7.7       | 9.7       | 9.2     | 9.5     |
| 8.1    | 7.8       | 9.4       | 7.5     | 5.4     |
| 12.1   | 11.0      | 8.8       | 8.5     | 9.2     |
| 7.6    | 8.8       | 7.3       | 10.1    | 11.1    |
| 10.5   | 9.5       | 9.8       | 7.2     | 8.1     |
| 7.6    | 8.0       | 7.9       | 10.3    | 9.6     |
| 11.2   | 11.1      | 11.0      | 9.2     | 8.1     |
| 9.3    | 8.9       | 8.5       | 11.2    | 12.2    |

Figure S3D (% of cell CD3<sup>+</sup> CD4<sup>+</sup> CD25<sup>+</sup> FoxP3<sup>+</sup>)

| 0µg/mL | 6.25µg/mL | 12.5µg/mL | 25µg/mL | 50µg/mL |
|--------|-----------|-----------|---------|---------|
| 3.2    | 4.4       | 4.4       | 5.6     | 5.1     |
| 5.0    | 7.3       | 7.1       | 8.6     | 2.3     |
| 5.2    | 4.2       | 4.2       | 2.5     | 1.9     |
| 4.4    | 5.1       | 7.9       | 7.1     | 4.4     |
| 4.6    | 2.2       | 5.4       | 2.3     | 2.6     |
| 4.1    | 4.2       | 3.0       | 3.5     | 5.0     |
| 5.2    | 5.6       | 2.4       | 4.2     | 5.9     |
| 4.7    | 2.6       | 6.3       | 3.9     | 3.1     |
| 4.8    | 2.9       | 2.2       | 4.1     | 3.8     |

Figure S3E (% of cell CD45<sup>+</sup> CD11b<sup>+</sup> CD103<sup>+</sup>)

| <b>0µg/mL</b> | <b>6.25µg/mL</b> | <b>12.5µg/mL</b> | <b>25µg/mL</b> | <b>50µg/mL</b> |
|---------------|------------------|------------------|----------------|----------------|
| 1.9           | 2.1              | 3.1              | 3.1            | 3.2            |
| 4.0           | 2.7              | 2.9              | 3.0            | 2.8            |
| 2.3           | 2.5              | 3.4              | 4.5            | 2.3            |
| 2.8           | 2.7              | 3.5              | 3.2            | 2.1            |
| 2.0           | 2.6              | 3.7              | 1.4            | 3.1            |
| 2.4           | 3.1              | 1.9              | 4.7            | 2.7            |
| 2.6           | 2.4              | 1.9              | 2.8            | 3.1            |
| 2.4           | 2.7              | 1.6              | 4.1            | 2.3            |
| 1.9           | 2.0              | 2.1              | 2.6            | 1.7            |

Figure S3F (% of cell CD3<sup>+</sup> CD4<sup>+</sup> Tbet<sup>+</sup>)

| <b>0µg/mL</b> | <b>6.25µg/mL</b> | <b>12.5µg/mL</b> | <b>25µg/mL</b> | <b>50µg/mL</b> |
|---------------|------------------|------------------|----------------|----------------|
| 19.8          | 18.2             | 21.5             | 22.5           | 19.7           |
| 18.1          | 19.0             | 19.8             | 12.8           | 16.3           |
| 16.6          | 16.6             | 20.9             | 21.5           | 19.8           |
| 21.8          | 20.5             | 18.8             | 22.6           | 16.2           |
| 21.0          | 19.4             | 17.0             | 18.8           | 15.3           |
| 21.1          | 17.8             | 20.5             | 20.9           | 19.8           |
| 17.9          | 18.9             | 22.0             | 18.0           | 21.3           |
| 18.2          | 20.1             | 20.4             | 20.9           | 23.6           |
| 17.5          | 20.4             | 20.2             | 19.6           | 16.7           |

Figure S3G (% of dead CD4<sup>+</sup> cells)

| <b>0µg/mL</b> | <b>6.25µg/mL</b> | <b>12.5µg/mL</b> | <b>25µg/mL</b> | <b>50µg/mL</b> |
|---------------|------------------|------------------|----------------|----------------|
| 4.58          | 4.76             | 2.49             | 2.74           | 3.43           |
| 4.03          | 1.4              | 4.35             | 2.82           | 4.82           |
| 0.64          | 3.11             | 1.45             | 1.61           | 2.76           |
| 4.3           | 1.19             | 1.62             | 2.4            | 3.91           |
| 0.78          | 1.87             | 1.74             | 1.07           | 3.42           |
| 3.59          | 2.92             | 2.43             | 4.46           | 1.6            |
| 2.11          | 1.29             | 3.01             | 3.08           | 1.99           |
