# Supplementary material
Source: PubMed Central journal article supplement (PMC10880545)
Supplement: ehp12758.smcontents.508.pdf [file ehp12758.smcontents.508.pdf]

**Note to readers with disabilities:** *EHP* strives to ensure that all journal content is accessible to all readers. However, some figures and Supplemental Material published in *EHP* articles may not conform to [508 standards](#) due to the complexity of the information being presented. If you need assistance accessing journal content, please contact [ehp508@niehs.nih.gov](mailto:ehp508@niehs.nih.gov). Our staff will work with you to assess and meet your accessibility needs within 3 working days.

### **Supplemental Material**

#### **Evaluating the Effects of Chronic Oral Exposure to the Food Additive Silicon Dioxide on Oral Tolerance Induction and Food Sensitivities in Mice**

Bruno Lamas, Natalia Martins Breyner, Yann Malaisé, Mark Wulczynski, Heather J. Galipeau, Eric Gaultier, Christel Cartier, Elena F. Verdu, and Eric Houdeau

#### **Table of Contents**

**Figure S1.** Transmission electron microscopy (TEM) analyses of the *fg*-SiO<sub>2</sub> particles. Representative transmission electron microscopy image of the *fg*-SiO<sub>2</sub> suspension in ultra-pure water (10 mg/mL).

**Figure S2.** Intestinal permeability in mice after oral exposure to food-grade SiO<sub>2</sub>. *In vitro* paracellular FITC-dextran flux measured for 1h in Ussing chambers in ileum (A) or colon (B) segments from mice orally exposed to *fg*-SiO<sub>2</sub> (n=8 mice per group) or to the vehicle (n=10) for 60 days. The data are expressed as median with interquartile range and whiskers extending from minimum to maximum ± SEM. \*p<0.05 by one-way ANOVA and *post-hoc* Tukey test (A) or Kruskal-Wallis test followed by a *post-hoc* Dunn's test (B). See Table S4 for data.

**Figure S3.** MLN cell viability and frequency after *ex vivo* treatment with food-grade SiO<sub>2</sub>. (A) Cell suspension from MLN of untreated mice (n=4 mice per group) were exposed for 48h to various concentrations of *fg*-SiO<sub>2</sub> (0, 6.25, 12.5, 25 and 50 μg/mL). Frequency of viable cells was evaluated by flow cytometry analysis of propidium iodide staining and normalized to control. (B-F) Cell suspension from MLN of untreated mice (n=9 per group) were exposed for 48h to various concentrations of *fg*-SiO<sub>2</sub> (0, 6.25, 12.5, 25 and 50 μg/mL) before stimulation for 5h with phorbol 12-myristate 13-acetate (PMA) and ionomycin. Frequency of CD3<sup>+</sup> CD4<sup>+</sup> cells (B), of CD3<sup>+</sup> CD4<sup>+</sup> CD25<sup>+</sup> cells (C), of CD3<sup>+</sup> CD4<sup>+</sup> CD25<sup>+</sup> FoxP3<sup>+</sup> cells (D), of CD45<sup>+</sup> CD103<sup>+</sup> CD11b<sup>+</sup> cells (E), and of CD3<sup>+</sup> CD4<sup>+</sup> Tbet<sup>+</sup> cells (F) was evaluated by flow cytometry. (G) Cell suspension from MLN of untreated mice (n=7 per group) were exposed for 3 days to concanavalin-A (a T-cell mitogen) in presence of various concentrations of *fg*-SiO<sub>2</sub> (0, 6.25, 12.5, 25 and 50 μg/mL). Frequency of dead T cells was evaluated by flow cytometry analysis of Viability 488/520 Fixable Dye staining. The data are expressed as median with interquartile range and whiskers extending from minimum to maximum ± SEM. \*p<0.05 by Kruskal-Wallis test followed by a *post-hoc* Dunn's test (A) or one-way ANOVA and *post-hoc* Tukey test (B-G). See Table S4 for data.

**Figure S4.** The gating strategy for analysis of T cell subpopulations from MLN *ex vivo* exposed to food-grade SiO<sub>2</sub>. Flow cytometry gating strategy for quantification of T cell subpopulations from MLN of untreated mice (n=9 per group) *ex vivo* exposed for 48h to various concentrations of *fg*-SiO<sub>2</sub> (0, 6.25, 12.5, 25 and 50 μg/mL) before stimulation for 5h with phorbol 12-myristate 13-acetate (PMA) and ionomycin. The frequency of CD3<sup>+</sup> CD4<sup>+</sup> cells, CD3<sup>+</sup> CD4<sup>+</sup> CD25<sup>+</sup> cells, CD3<sup>+</sup> CD4<sup>+</sup> CD25<sup>+</sup> Foxp3<sup>+</sup> cells, CD3<sup>+</sup> CD4<sup>+</sup> CD25<sup>+</sup> Foxp3<sup>+</sup> IL-10<sup>+</sup> cells, CD3<sup>+</sup> CD4<sup>+</sup> Tbet<sup>+</sup> cells, and CD3<sup>+</sup> CD4<sup>+</sup> Tbet<sup>+</sup> IFN-γ<sup>+</sup> cells was evaluated by flow cytometry. SS: side scatter. FS: forward scatter. FS-H: forward scatter height.

**Figure S5.** The gating strategy for analysis of CD45<sup>+</sup> CD11b<sup>+</sup> CD103<sup>+</sup> cells from MLN *ex vivo* exposed to food-grade SiO<sub>2</sub>. Flow cytometry gating strategy for quantification of CD45<sup>+</sup> CD11b<sup>+</sup> CD103<sup>+</sup> cells (including DC and macrophage subpopulations) from MLN of untreated mice (n=9 per group) *ex vivo* exposed for 48h to various concentrations of *fg*-SiO<sub>2</sub> (0, 6.25, 12.5, 25 and 50 μg/mL) before stimulation for 5h with phorbol 12-myristate 13-acetate (PMA) and ionomycin. The frequency of CD45<sup>+</sup> CD11b<sup>+</sup> CD103<sup>+</sup> cells and CD45<sup>+</sup> CD11b<sup>+</sup> CD103<sup>+</sup> TGF-β<sup>+</sup> cells was evaluated by flow cytometry. SS: side scatter. FS: forward scatter. FS-H: forward scatter height.

**Figure S6.** The gating strategy for analysis of T cells proliferation. Flow cytometry gating strategy for quantification of CD4<sup>+</sup> proliferating cells isolated from MLN of untreated mice. Cell suspension from MLN of untreated mice were exposed for 3 days to concanavalin-A (a T-cell mitogen) in the absence or presence of various concentrations of *fg*-SiO<sub>2</sub> (0, 6.25, 12.5, 25 and 50 μg/mL). SS: side scatter. FS: forward scatter. FS-H: forward scatter height.

**Figure S7.** The gating strategy for analysis of T cells from colon *lamina propria*. Flow cytometry gating strategy for quantification of CD3<sup>+</sup> CD4<sup>+</sup> and CD3<sup>+</sup> CD4<sup>+</sup> CD25<sup>+</sup> subpopulations isolated from the colon *lamina propria* of OVA-immunized (PBS) or OVA-tolerized mice exposed to a vehicle or *fg*-SiO<sub>2</sub> through gavage (gav) or food. SS: side scatter. FS: forward scatter. FS-H: forward scatter height.

**Figure S8.** The gating strategy for analysis of CD45<sup>+</sup> CD11b<sup>+</sup> CD103<sup>+</sup> cells from colon *lamina propria*. Flow cytometry gating strategy for quantification of CD45<sup>+</sup> CD11b<sup>+</sup> and CD103<sup>+</sup> subpopulations isolated from the colon *lamina propria* of OVA-immunized (PBS) or OVA-tolerized mice exposed to a vehicle or *fg*-SiO<sub>2</sub> through gavage (gav) or food. SS: side scatter. FS: forward scatter. FS-H: forward scatter height.

**Table S1.** *fg*-SiO<sub>2</sub> sample characterization by DLS.

**Table S2.** Oral tolerance and challenge with OVA protocol.

**Table S3.** qPCR primers used for gene expression analysis.

**Table S4.** Corresponding numeric data for all figures. Reported is the measured data for all replicates.
